# Supplementary material for: Slope Dynamics in Relation to the Occupation and Abandonment of a Mountain Farm in Þistilfjörður, Northeast Iceland
Source: MDPI journal article supplement (doi:10.3390/geosciences13020030), 2023-01-25
Supplement: s1 [file s1]

Table S1. Synthesis of the episodes of slope activity recorded in the archives.

| Year | Area       | Event description                                                    | Source                                                      | Icelandic                                                                                                                                                                                                                                                                                                                                                                          | English                                                                                                                                                                                                                                                                                                                                                           |
|------|------------|----------------------------------------------------------------------|-------------------------------------------------------------|------------------------------------------------------------------------------------------------------------------------------------------------------------------------------------------------------------------------------------------------------------------------------------------------------------------------------------------------------------------------------------|-------------------------------------------------------------------------------------------------------------------------------------------------------------------------------------------------------------------------------------------------------------------------------------------------------------------------------------------------------------------|
| 1712 | Flautafell | Flautafell's field was destroyed and information about Flutningsfell | Jarðabók Árna Magnússonar og Páls Vidalíns, p.359           | <i>Flautafell, nokkrir segja jörðin hafi heitið Flutningsfell (...)</i><br><br><i>Túnið spillist af langvarandi órækt og eitt skriðufall úr fjallinu sem eyðilagð hefur nokkurn part af honum (þ.e. vellinum)</i>                                                                                                                                                                  | Flautafell, some say the land was called Flutningsfell. (...) The field went into disarray due to not being cultivated for a long time and a landslide from the mountain partially ruined it as well.                                                                                                                                                             |
| 1875 |            | Reference to an event destroying a field                             | Sýslu og sóknarlýsingar Bókmenntafélagsins, p.245. 258, 267 | <i>II g.) Í fjallinu (Flautafellsfjall) er litið graslendi og hefur það eyðst af skriðum. ...Landbrot af skriðumúr fjallinu. ...Skriðugarða þarf hér eigi við, enda eru þeir hvergi, nema vallargarðurinn að Flautafelli er jafnframt skriðuvörslugarður, þeim megin sem að fjalli veit</i>                                                                                        | There isn't much grassland in the mountain as it has been mostly destroyed by landslides... traces of a landslide wall...walls to defend against landslides are not needed here and are nowhere to be found, except the wall near Flautafell which faces the mountain.                                                                                            |
| 1712 | Norður Hús | Mention of an old farm relocated due to avalanches                   | Jarðabók Árna Magnússonar og Páls Vidalíns, p.359           | <i>Norðurhús kallast Fornt Eyðiból Skamt</i><br><br><i>Út Frá jörðunni og eru munnmæli að bærinn (Flautafell) hafi þar í fyrndinni staðið og þaðan undan snjóflóðum fluttur verið</i><br><br><i>Þángað sem hann er nú og Þvi jörðin kallast Flutningsfell.</i>                                                                                                                     | Norðurhús is the name of an ancient abandoned farm a short distance away out from the pasture and according to the legend that farm (Flautafell) was moved to its current location due to avalanches, thus the name of the farm is now Flutningsfell (i.e. moving mountain).                                                                                      |
| 1875 |            | Reference to an old farm relocated due to avalanches.                | Sýslu og sóknarlýsingar Bókmenntafélagsins, p.262           | <i>8. Norðurhús, sem nú eru kölluð, spólkorn fyrir utan Flautafellsbae, mitt á milli Svalbarðsár og fjalsins. Þar sér merki til tófta og vallargarðs og hefur Þar sjálfsat bær verið. Sumir segja að Þar hafi fyrstum bær staðið. Og heitið Fell, og síðan verið fluttur og nefndur Þá Flutningsfell. Nefna sumir Flautafel Þvi nafni en vér ætlum Þetta eigi Stekkur að vera.</i> | Nordurhús, as it was called, close to Flautafellsbaer, is between Svalbarðsá and the mountain. One can find ruins of a mountain wall and there was probably a town there. Some say that there was once a farm there, and that it was called Fell, it was then moved and called Flutningsfell, some call it Flautafell, but we believe this is a misunderstanding. |
| 1875 | Garður     | Observations of slope processes on the east side of Flautafell       | Sýslu og sóknarlýsingar Bókmenntafélagsins, p.258           | <i>21. Landbrot af skriðumúr Flautafelli að austanverðu</i>                                                                                                                                                                                                                                                                                                                        | Traces of a landslide on the wall east of Flautafell.                                                                                                                                                                                                                                                                                                             |
